# Supplementary material for: Asian aridification linked to the first step of the Eocene-Oligocene climate Transition (EOT) in obliquity-dominated terrestrial records (Xining Basin, China)
Source: Copernicus journal article supplement (doi:10.5194/cp-6-501-2010), 2010-07-29
Supplement: Supplementary file 1 [file XIAO_Supplementary Figure S1.doc]

Supplementary Figure

Figure S1. Magnetostratigraphy, lithostratigraphy, magnetic susceptibility (MS) and the inferred obliquity-cycle bandpass filters of the Tashan section against Age Model 2 and Age Model 3 (see text for explanation). Arrows indicate the last prominent gypsum bed G7 (arrow 1) and the last regionally correlatable gypsum bed G4 (arrow 2), and the hypothetical position of Step 2 or Oi-1 event within the terrestrial stratigraphy (arrow 3), while the green line indicates the hypothetical position of the Eocene-Oligocene boundary (EOB) relative within C13r.
