# Supplementary material for: Asian aridification linked to the first step of the Eocene-Oligocene climate Transition (EOT) in obliquity-dominated terrestrial records (Xining Basin, China)
Source: Copernicus journal article supplement (doi:10.5194/cp-6-501-2010), 2010-07-29
Supplement: Supplementary file 2 [file XIAO_Supplementary Table.xls]

## Sheet: XIAO_Supplementary Table
Sample ID	Depth	low temp	high temp	n	Dec	Inc	VGP lat	MAD
	(m)	(ºC)	(ºC)		(º)	(º)	(º)	(º)
04TS-252.5	458	400	585	5	162.5	4	-48.1934	2.4
04TS-252.75	458.25	300	650	8	210.7	-34.6	-57.9275	2.2
04TS-253	458.5	250	620	8	215.6	-27.9	-51.6354	3
04TS-253.25	458.75	350	650	8	181.5	-21.2	-64.4396	1.8
04TS-253.5	459	250	650	9	178.3	-26.3	-67.3295	1.2
04TS-253.75	459.25	300	620	8	174.4	-26.4	-66.8895	2.1
04TS-254.25	459.75	350	500	4	198.3	-35.2	-66.5775	5.1
04TS-254.5	460	350	500	4	186.1	-15.2	-60.7036	2.9
04TS-255	460.5	450	585	4	213.3	-28.5	-53.537	5.7
07TS-43.6	464.3	350	610	7	351.7	30.4	68.5455	3.3
07TS-43.8	464.5	300	610	8	352.6	33.9	70.9257	2.6
07TS-44	464.7	200	550	8	355.8	29	68.661	1.2
07TS-44.25	464.95	350	585	6	22.5	40.5	66.4341	3.2
07TS-44.4	465.1	350	670	8	36.5	24.7	49.7348	2.4
07TS-45	465.7	350	585	6	7.3	16.4	61.0978	2.4
07TS-45.25	465.95	350	550	5	21.5	56.5	72.808	1.3
07TS-45.5	466.2	350	610	7	54.5	58.2	47.4564	4.2
07TS-45.75	466.45	300	640	9	11.9	23.1	63.297	2.5
07TS-46	466.7	450	670	7	341.7	30	63.927	3.1
07TS-46.25	466.95	350	610	7	335.5	59.3	70.5037	1.9
07TS-46.5	467.2	350	610	7	1	42.9	78.3893	5.3
07TS-47.25	467.95	350	550	5	324.1	30.8	52.5547	3.9
S4751*	468.21	300	640	9	7.2	29.4	68.2698	2.3
07TS-47.75	468.45	350	585	6	1.5	33.8	71.9581	1.7
07TS-48.25	468.95	350	550	5	7.7	1.7	53.6438	3.5
07TS-49	469.7	350	585	6	160.1	-26.5	-61.3174	4
S4952*	470.22	300	640	9	155.4	1	-46.5252	3.2
07TS-52.5	473.2	350	585	6	11.1	36.8	71.3011	2.3
07TS-52.75	473.45	300	610	8	9.1	47	78.698	1.6
07TS-53.5	474.2	350	640	8	6.2	13.2	59.6549	2.3
07TS-53.75	474.45	300	610	8	16.8	37.8	68.8378	2.5
07TS-54	474.7	250	640	10	30.7	34.6	57.9275	3.2
07TS-54.25	474.95	350	640	8	355.3	15.8	61.2328	2.4
07TS-54.5	475.2	350	670	9	5.8	39	74.6917	3
07TS-54.75	475.45	300	640	9	10.9	30.1	67.4791	2.8
07TS-55	475.7	400	610	6	2.8	44.5	79.3955	2.3
07TS-55.25	475.95	350	550	5	40.2	35.3	51.0131	2.2
07TS-55.5	476.2	350	550	5	10.8	47.6	78.0332	4.7
07TS-55.75	476.45	300	550	6	17.5	54.9	75.815	1.5
07TS-56	476.7	200	550	8	32.7	50.9	62.6028	1.7
07TS-56.25	476.95	350	610	7	22.9	47.1	69.0579	2.3
07TS-56.4	477.1	350	640	8	12.5	36.6	70.5236	2.7
07TS-56.75	477.45	300	550	6	353.7	34.2	71.4225	1.5
07TS-57	477.7	300	585	7	340.7	31.3	64.0126	2.3
07TS-57.25	477.95	350	670	9	33.4	36.7	56.7799	4.5
07TS-57.5	478.2	350	550	5	1	36.1	73.5089	2.1
07TS-57.75	478.45	300	640	9	14.9	41.6	72.0554	2.5
07TS-58	478.7	200	585	9	18	36.4	67.3782	1.4
07TS-58.25	478.95	350	610	7	19.2	20	58.5808	2.3
07TS-58.5	479.2	350	500	4	351.4	13.1	59.1194	1.5
07TS-58.7	479.4	300	670	10	358.2	37	74.0676	2.7
07TS-59	479.7	150	585	10	354.4	49.2	82.0598	2.8
07TS-59.25	479.95	350	550	5	355.9	13.3	60.0058	4.2
07TS-59.4	480.1	350	550	5	349.9	26.8	65.9182	4.9
07TS-59.75	480.45	300	550	6	354.5	59.4	84.3111	4.6
07TS-60.75	481.45	400	550	4	173.8	-31.5	-69.7763	4.7
07TS-61.25	481.95	350	585	6	210.8	-34.3	-57.729	3.4
07TS-61.5	482.2	350	550	5	205	-22.7	-56.6039	2.4
07TS-61.75	482.45	300	610	7	172.6	-45.1	-78.3106	2.1
07TS-62	482.7	300	550	6	213.6	-27.2	-52.7992	3.5
07TS-62.75	483.45	300	640	9	179.1	-43.8	-79.0898	2.3
07TS-63	483.7	350	585	6	168.9	-55.5	-81.0435	3.1
07TS-63.25	483.95	350	640	7	205.8	-27.9	-58.4138	5.3
07TS-63.5	484.2	350	670	9	194.7	-39.8	-71.1724	3.5
07TS-63.75	484.45	300	670	10	174.5	-47.3	-80.7137	2.9
07TS-64	484.7	300	585	7	218.9	-47.7	-56.5875	2.5
07TS-64.25	484.95	350	610	7	209.8	-26.6	-55.1995	1.8
07TS-64.5	485.2	350	610	7	193.8	-27.7	-64.9716	2.1
07TS-64.7	485.4	300	670	10	192	-21.4	-62.3743	4.7
*07TS-65.25	485.95	350	500	4	341.6	66.5	71.6899	10.8
07TS-65.75	486.45	450	610	5	202.4	-61.1	-71.8335	6.4
07TS-66	486.7	200	585	9	203.2	-37.1	-64.3537	1.7
07TS-66.25	486.95	350	585	6	184.9	-31.5	-70.0577	2.1
07TS-66.5	487.2	350	640	8	203	-27.4	-59.9422	3.2
07TS-66.7	487.4	300	585	7	175.3	-31.6	-70.1572	3.6
07TS-67	487.7	200	640	11	191.4	-23.9	-63.8981	2.4
07TS-67.25	487.95	350	610	6	170.8	-16.4	-60.6523	4.2
07TS-67.5	488.2	350	640	8	195	-25.4	-63.2359	3
07TS-67.75	488.45	300	585	7	185.6	-52.1	-84.0358	1.9
07TS-68.25	488.95	350	585	6	205.8	-30.7	-59.6648	3.5
07TS-68.5	489.2	350	640	8	215.6	-26	-50.8898	2.6
07TS-68.75	489.45	300	670	10	173.8	-26.9	-67.0544	2.4
07TS-68.95	489.65	200	640	11	160.5	-29.3	-62.9068	2.9
07TS-69.25	489.95	350	670	9	205.2	-26.1	-57.993	3.4
07TS-69.5	490.2	350	640	8	200.6	-29.4	-62.3212	3.9
07TS-69.75	490.45	300	670	10	209.4	-21.8	-53.454	1.6
07TS-70	490.7	250	640	9	191.8	-23.3	-63.4382	1.3
07TS-70.25	490.95	350	670	9	187.9	-72.6	-67.9511	3
*07TS-71.25	491.95	350	670	9	177.9	3	-51.9488	1.2
07TS-71.5	492.2	350	690	10	206.8	-20.9	-54.7196	1.5
07TS-71.75	492.45	300	640	9	195.6	-46.7	-74.3077	2.4
07TS-72	492.7	150	585	10	181	-42.8	-78.3129	1.9
07TS-72.2	492.9	350	610	7	180.7	-25.8	-67.0797	5.1
07TS-72.75	493.45	300	550	6	198.1	-17.2	-57.7866	3.9
07TS-73	493.7	200	610	10	217.4	-51.9	-59.1209	2.3
07TS-73.2	493.9	350	610	7	219.5	-59.1	-59.0236	1.3
07TS-74	494.7	250	585	8	199.8	-49.4	-72.368	2.4
07TS-74.25	494.95	350	610	7	198.5	-41.9	-69.8849	1.2
07TS-74.5	495.2	350	640	8	177.7	-19.3	-63.3501	1.6
07TS-74.75	495.45	300	670	10	188.1	-19.4	-62.4898	2
07TS-75	495.7	200	500	7	145.4	-34	-54.793	2.1
07TS-75.2	495.9	350	610	7	151.9	-37.3	-60.9727	4.2
07TS-75.75	496.45	300	640	9	191.5	-45.7	-76.4811	3.9
07TS-77.2	497.9	350	585	5	193.8	-20.6	-61.293	5.2
07TS-77.25	497.95	350	550	5	202.3	-11	-52.9194	5.4
07TS-77.75	498.45	300	585	7	200.2	-21.1	-58.5875	3.7
07TS-78	498.7	250	640	10	195.9	-41.2	-71.2166	2.2
07TS-78.25	498.95	350	585	6	207.8	-1.8	-46.0821	3.5
07TS-78.5	499.2	350	585	6	190.7	-25.5	-65.0017	3.7
07TS-78.75	499.45	300	585	7	187.4	-34.1	-71.0496	3.6
07TS-79	499.7	200	585	9	222.4	-46.1	-53.2258	1.7
07TS-79.25	499.95	350	610	7	184.6	-33.3	-71.2389	2.2
07TS-79.5	500.2	350	610	7	204.9	-37.7	-63.4479	3
07TS-79.75	500.45	300	585	7	181.2	-23.1	-65.5152	1.8
07TS-80	500.7	250	640	10	184	-20.5	-63.8375	1.7
07TS-80.2	500.9	350	500	4	213.1	-51.8	-62.5452	6
07TS-80.5	501.2	350	610	7	219.7	-45.1	-55.0409	4.2
07TS-80.75	501.45	300	550	6	215.9	-32.7	-53.3021	1.5
07TS-81	501.7	150	585	10	178	-42.8	-78.219	1.8
07TS-81.25	501.95	350	670	9	171.7	-57.5	-83.204	3.5
07TS-81.5	502.2	350	670	9	192.3	-39.3	-72.2098	4.9
07TS-81.75	502.45	300	550	6	201.3	-28.8	-61.6202	3.1
07TS-82	502.7	200	500	7	224.3	-31.5	-46.4132	1
07TS-82.25	502.95	350	585	6	216.7	-21.8	-48.4731	2.9
07TS-82.5	503.2	350	670	9	193.6	-28.5	-65.4869	2.9
07TS-82.75	503.45	300	550	6	201.7	-30.4	-62.1439	1.6
07TS-83	503.7	200	550	8	182.8	-39.6	-75.7636	2.6
07TS-87.25	507.95	350	640	8	180.6	-33.5	-71.8039	0.9
07TS-87.5	508.2	350	670	9	220	-26.2	-47.737	2.7
07TS-87.75	508.45	400	550	4	176	-20.5	-63.8375	3.5
07TS-88	508.7	250	500	6	183.7	-16	-61.4595	3.4
07TS-88.2	508.9	350	585	6	229.3	-48.6	-48.5391	3.1
07TS-89	509.7	150	640	11	191.3	-52.2	-80.0054	3.1
07TS-89.25	509.95	350	670	9	205.9	-26.8	-57.8609	5.3
07TS-89.75	510.45	350	550	5	176	-20.7	-63.9469	5.6
07TS-92.75	513.45	300	450	4	185.7	-3.7	-54.9536	2.6
07TS-93	513.7	150	610	11	215.5	-37.9	-55.6516	1.6
07TS-93.4	514.1	400	550	4	207.8	-8.5	-48.8879	9
07TS-93.6	514.3	350	500	4	161.9	-24.6	-61.3476	12.1
07TS-96.25	516.95	350	585	6	211	-14.5	-49.4317	3.8
07TS-96.5	517.2	350	500	4	205.2	-11.7	-51.6973	5
07TS-99.75	520.45	350	585	6	216.7	-27.3	-50.5972	6.6
07TS-100	520.7	400	640	7	180.9	-15.6	-61.4355	6.9
07TS-100.25	520.95	350	500	4	212.4	-37.8	-57.9817	14.6
07TS-100.5	521.2	350	500	4	201	-3.2	-50.0668	5.9
07TS-100.75	521.45	500	610	4	178.1	-11.9	-59.4653	9.9
07TS-102.2	522.9	350	670	9	206.7	-37.4	-62.0304	2.8
07TS-102.4	523.1	350	610	7	144.1	-47.3	-58.8583	2.5
07TS-102.6	523.3	350	670	9	194.9	-51.4	-76.9296	1.9
07TS-102.8	523.5	300	585	7	175.9	-18.1	-62.5283	2.3
07TS-103	523.7	200	550	8	192	-31.4	-67.7709	1.5
07TS-103.25	523.95	350	640	8	189.9	-38.8	-73.0591	3.2
07TS-103.5	524.2	350	585	6	195.8	-25.7	-63.0221	3.4
07TS-103.75	524.45	300	500	5	219.5	-34.8	-51.3668	1.7
07TS-104	524.7	250	500	6	195.3	-31.2	-66.1317	7.6
07TS-106.3	527	400	550	4	214.2	-21.6	-50.1486	8.9
07TS-106.5	527.2	500	670	5	198.6	-31.4	-64.4649	7.8
07TS-106.75	527.45	300	500	5	205.1	-14.1	-52.7873	3.7
07TS-107	527.7	500	670	6	179.7	-22.1	-64.9752	3.9
07TS-107.2	527.9	350	585	6	172.5	-22.7	-64.4055	3.4
07TS-107.4	528.1	350	670	9	196.9	-50.1	-74.8834	3
07TS-109.25	529.95	350	670	9	178.4	-35	-72.7381	5
07TS-109.5	530.2	350	585	6	177.7	-36.2	-73.4769	1.3
07TS-109.75	530.45	300	500	5	171.1	-17.9	-61.5043	3.9
07TS-110	530.7	250	500	6	154.1	-22	-55.749	2.7
07TS-110.25	530.95	350	550	5	206	-41.5	-64.3393	5.3
07TS-112.8	533.5	300	550	6	184	-43.3	-78.2207	2.4
07TS-113	533.7	250	550	8	185	-12.3	-59.3779	1.9
07TS-113.25	533.95	350	585	6	172.6	-38.2	-73.6571	2.7
07TS-113.75	534.45	300	670	9	176.8	-19.9	-63.5999	1.7
07TS-114	534.7	350	610	8	169.4	-16.5	-60.3148	3.2
07TS-114.25	534.95	400	640	7	178.1	-31.6	-70.5253	5.2
07TS-114.5	535.2	350	640	8	225.1	-53.5	-53.4347	4.4
07TS-116.5	537.2	400	585	5	212.5	-40.9	-59.1515	7.2
07TS-117.2	537.9	350	550	5	145.7	-34.3	-55.1379	5.3
07TS-117.6	538.3	350	585	6	193.4	-34.3	-68.7686	6
07TS-117.9	538.6	350	525	5	167.6	-41.2	-73.2831	4.9
07TS-119.3	540	300	610	9	202.7	-37.7	-64.9781	2.3
07TS-119.6	540.3	350	640	7	187.4	-40.7	-75.3101	4.5
07TS-119.8	540.5	300	670	10	175.2	-36.6	-73.3352	2.3
07TS-119.95	540.65	200	585	10	181.7	-27.7	-68.1559	1.6
07TS-120.25	540.95	350	610	7	203.4	-44.3	-67.498	3.1
07TS-120.5	541.2	350	500	4	195.5	-49.3	-75.6101	3
07TS-121	541.7	200	610	11	209	-13	-50.0532	1.4
07TS-121.5	542.2	350	550	5	178.9	-38.2	-74.9473	4.3
07TS-122.25	542.95	350	585	6	192	-26	-64.8005	3.7
07TS-122.5	543.2	350	585	6	183.5	-24.5	-66.1286	3.3
07TS-122.75	543.45	300	640	9	191.2	-30.5	-67.5892	2.1
07TS-123.25	543.95	350	610	7	185.9	-23.4	-65.1355	3.1
07TS-123.5	544.2	350	550	5	193.2	-14.1	-58.2814	3.7
07TS-123.75	544.45	300	585	7	220.4	-54.2	-57.3508	2.7
07TS-124	544.7	200	585	10	180.3	-22.6	-65.2556	2.6
S12450	545.2	300	450	4	176	-25.9	-66.8675	2.4
07TS-125	545.7	250	585	9	160.9	-44.3	-70.6501	3.8
07TS-125.25	545.95	350	640	7	177.7	-62.1	-82.9176	1.8
07TS-125.4	546.1	350	670	9	198.5	-19.1	-58.4977	3
07TS-125.65	546.35	300	550	6	19.9	34.7	65.3489	3.4
07TS-127.25	547.95	350	550	5	14.2	28.6	65.272	1.6
07TS-127.5	548.2	350	610	7	36	38.2	55.3825	3.6
07TS-127.75	548.45	300	500	5	20.4	31.8	63.6094	2.8
07TS-128	548.7	300	585	9	8.5	7.8	56.4926	2
07TS-128.25	548.95	350	550	5	4.2	31	69.8747	3.3
07TS-128.5	549.2	350	550	5	6.5	29.7	68.6227	4.2
07TS-128.75	549.45	300	585	7	8	48.2	80.0966	6.1
07TS-129	549.7	250	500	6	25.1	34.4	61.8079	6.8
07TS-129.25	549.95	400	585	5	31.2	24.4	53.3339	10.1
07TS-129.75	550.45	300	450	4	13.5	36.9	70.1924	10.8
07TS-131.75	552.45	300	640	9	16.3	11.2	55.7302	1.3
07TS-132.25	552.95	350	610	7	179.4	-25.4	-66.8495	4.8
07TS-132.5	553.2	400	610	6	169.3	-5.3	-54.7451	3.2
07TS-133	553.7	350	550	7	205.7	-48.1	-67.2608	7.5
07TS-133.25	553.95	350	610	7	196.8	-35.7	-67.7207	2.5
07TS-133.5	554.2	350	640	8	201.2	-18.3	-56.7677	3
07TS-135.5	556.2	350	610	7	218.5	-30.6	-50.5295	5.1
07TS-135.75	556.45	300	610	7	160.8	-22.7	-59.8644	4.2
07TS-136	556.7	350	670	11	212	-10	-46.9967	3
07TS-136.5	557.2	350	500	4	205.1	-7.9	-50.1185	1
07TS-137.5	558.2	350	585	6	20.5	37.8	66.504	3.5
07TS-137.75	558.45	450	585	4	353.8	11.5	58.7874	3.8
07TS-138	558.7	250	585	10	4.1	14.7	60.733	1.7
S13852*	559.22	300	610	8	16.3	21.8	60.834	2.9
07TS-138.75	559.45	300	500	5	11.4	28.9	66.6147	2.7
07TS-139.5	560.2	350	585	6	20.1	14.7	55.6745	2.2
07TS-139.75	560.45	300	640	9	18.6	8.1	53.3378	1.6
07TS-140	560.7	300	550	7	17.4	11.5	55.4198	3.3
07TS-140.15	560.85	350	550	5	18.4	18.6	58.3084	2.9
Discarded outlying direction with VGP laying more than 45 degrees from the mean VGP
07TS-43.4	464.1	400	550	4	174	38.9	-31.2543	7
07TS-44.75	465.45	300	585	7	37.5	0.1	39.6623	3.3
07TS-46.75	467.45	350	610	7	286.2	32.5	23.2176	4
07TS-47	467.7	250	450	5	248.5	59.1	8.93236	3.7
07TS-48	468.7	300	450	4	74.5	27.5	20.9606	4.3
07TS-49.5	470.2	350	550	5	136.1	38.5	-18.5656	3.9
S4977	470.47	300	500	5	112.4	-12.5	-21.7153	5
S5000	470.7	350	585	6	235.1	32.2	-15.0729	5.4
07TS-50.5	471.2	610	690	4	209.9	25.6	-32.6232	17.3
07TS-50.7	471.4	300	500	4	8.7	-17.8	43.6524	5.7
S5075	471.45	300	500	5	32.2	-44.6	20.3063	8.5
07TS-51	471.7	300	670	10	311	-47.8	10.055	2.2
S5102	471.72	300	550	6	325.7	-19.6	33.3341	3.1
07TS-51.25	471.95	350	585	6	306.2	-9.9	24.9138	2.1
07TS-51.5	472.2	350	500	4	279.8	14.1	12.1153	2.7
*S5153	472.23	300	610	8	259.3	22.6	-1.42768	4.6
07TS-51.75	472.45	450	670	6	245.4	18.4	-13.4443	3
S5177	472.47	300	640	9	212.6	45.9	-19.2132	3.8
S5180	472.5	300	550	6	211.4	40.4	-23.4808	4.6
07TS-52	472.7	350	610	7	222.6	22.9	-27.1309	3.8
S5202	472.72	300	550	6	211.6	29.5	-29.7951	2.2
S5204	472.74	300	585	7	206.4	37.5	-27.334	4.3
07TS-52.2	472.9	350	610	7	199.2	29.3	-34.7658	3.7
S5222	472.92	300	610	8	195.1	41.4	-28.0498	2.7
07TS-53	473.7	300	585	6	50.8	20.8	37.5989	2.7
07TS-53.2	473.9	400	640	7	50.8	19	36.9858	4.8
07TS-60	480.7	350	500	4	96.2	15.8	-0.150736	12.6
07TS-60.25	480.95	350	550	5	112.8	-51.7	-35.5473	9
07TS-61	481.7	300	585	7	253.3	-40.6	-26.5273	3.9
07TS-62.25	482.95	350	670	7	237.7	-44	-40.1993	2
07TS-62.5	483.2	350	550	5	236.2	-19.4	-32.926	3.7
07TS-65	485.7	400	585	5	229.2	-22.4	-39.3834	5.3
07TS-65.5	486.2	350	640	8	234.4	-24.6	-36.0773	3
07TS-72.5	493.2	350	500	4	33.9	-70.5	-5.72692	7.8
07TS-73.5	494.2	350	550	5	224.4	-14.7	-40.3021	9
07TS-77	497.7	250	550	7	236.9	-41.3	-39.8771	4.1
07TS-89.5	510.2	350	670	9	226.2	-27.4	-43.4579	5.9
07TS-104.2	524.9	400	550	4	239.1	-59.6	-44.4282	3.8
07TS-106.1	526.8	450	640	6	227.9	-28.5	-42.5274	11.5
07TS-110.5	531.2	350	500	4	214.8	49.8	-15.3791	9.1
07TS-112.25	532.95	450	585	4	228.5	-11.1	-36.0278	2.3
07TS-112.5	533.2	350	550	5	221.9	10.2	-32.8619	9.8
07TS-114.75	535.45	400	585	5	119.7	-15.3	-28.3734	10.6
07TS-114.9	535.6	300	500	5	132.5	54.4	-6.0076	6.4
07TS-115.8	536.5	350	550	5	306	-6.3	26.0396	13.6
07TS-116.25	536.95	350	500	4	317.5	13.3	41.177	10.3
07TS-120.75	541.45	350	585	6	220.7	-20.1	-44.954	4.2
07TS-121.25	541.95	350	640	8	217.3	-6.4	-42.2024	0.9
07TS-121.75	542.45	400	550	4	243.7	12.4	-16.8002	5.1
07TS-122	542.7	250	550	8	223.3	-2.2	-36.6083	2.6
07TS-124.75	545.45	300	670	10	240.9	-22.7	-30.2941	2.3
07TS-133.75	554.45	400	640	7	188.2	24	-40.344	6.7
07TS-136.25	556.95	550	670	5	196.2	12.6	-44.5149	5.5
07TS-136.75	557.45	400	610	6	223	-2.6	-36.9598	2.5
07TS-137	557.7	400	525	4	270.4	-7.4	-1.88799	5.9
Note to Table: Sample ID - number of sample; Depth - stratigraphic level of sample in meters;
low (high) temp - lower (higher) step of the temperature range used to determine ChRM direction in degrees Celcius;
n - number of points/steps used to determine the ChRM direction; Dec (Inc) - Declination (Inclination) of ChRM direction;
VGP lat - Virtual Geomagnetic Pole latitude derived from the ChRM direction; MAD - Maximum Angular Deviation of ChRM direction;
*discarded isolated polarity direction.
